# Supplementary material for: Treatment of dye wastewater nanofiltration concentrates containing high anion levels by a pH-sensitive nano-sized Fe(iii)@silica microgel
Source: Royal Society of Chemistry journal article supplement (doi:10.1039/c7nj02575k), 2017-01-01
Supplement: c7nj02575k1.pdf [file c7nj02575k1.pdf]

**Supplemental Information of**  
**“Treatment of dye wastewater nanofiltration concentrates**  
**containing high level anions by pH sensitive nano-size**  
**Fe(III)@silica microgel” for New Journal of Chemistry**

ChunMing Zheng<sup>a,b\*</sup>, DongYing Lian<sup>a</sup>, ShuBin Chang<sup>a</sup>, Chao Ma<sup>b</sup>, MengWei Du<sup>a</sup>, XiaoHong

Sun<sup>c,\*</sup>

<sup>a</sup>State Key Laboratory of Separation Membranes and Membrane Processes, School of  
Environmental and Chemical Engineering, Tianjin Polytechnic University, Tianjin 300387, China.

<sup>b</sup>Tianjin Engineering Center for Safety Evaluation of Water Quality & Safeguards Technology,  
Tianjin Polytechnic University, Tianjin 300387, China

<sup>c</sup>Key Laboratory of Advanced Ceramics and Machining Technology, Ministry of Education,  
School of Materials Science and Engineering, Tianjin University, Tianjin 300072, China.

---

\* Corresponding authors. Tel./Fax: +86 022 83955661.

E-mail address: zhengchunming@tjpu.edu.cn (C.M. Zheng).

\* Corresponding authors. Tel./Fax: +86 022 27406114.

E-mail address: sunxh@tju.edu.cn (X.H. Sun).

### *1. FT-IR Characterization*

The FT-IR spectra of  $m\text{SiO}_2$ ,  $\text{Fe(III)}@m\text{SiO}_2$ ,  $\text{Cys-Fe(III)}@m\text{SiO}_2$  and used  $\text{Cys-Fe(III)}@m\text{SiO}_2$  after coagulation and Fenton-like degradation are shown in Fig. S1. The broad peak in the range of  $3300\text{-}3600\text{ cm}^{-1}$  could be associated with the stretching vibration of  $-\text{OH}$ . And the peaks at  $1637\text{-}1641\text{ cm}^{-1}$  correspond to the bending vibration of water adsorbed, polymerized and crystallized in the coagulant. Furthermore, the peaks at  $2361\text{-}2365\text{ cm}^{-1}$  are due to carbon dioxide in air. The peaks at  $1016\text{-}1018\text{ cm}^{-1}$  and around  $958\text{ cm}^{-1}$  in  $\text{Fe(III)}@m\text{SiO}_2$  and  $\text{Cys-Fe(III)}@m\text{SiO}_2$  correspond to symmetrical stretching vibrations of  $\text{Si-O-Fe}$  respectively. In addition, the strong absorption peaks at  $1098\text{-}1100\text{ cm}^{-1}$  correspond to the stretching vibrations of  $\text{Fe-OH-Fe}$ , which indicates the polymer are formed in the  $\text{Fe(III)}@m\text{SiO}_2$ . But these peaks weakened at  $\text{Cys-Fe(III)}@m\text{SiO}_2$ .  $\text{Fe-O-Fe}$  and  $\text{Fe-O}$  are probably formed with the transformation of  $\text{Fe-OH-Fe}$  and  $\text{Fe-OH}$  bonds. The peaks at  $603\text{-}605$  and  $459\text{-}460\text{ cm}^{-1}$  correspond to the winding vibration of  $\text{Si-O}$  and  $\text{Fe-O}$ . Bending vibration of  $\text{Fe-OH}$  corresponds to the peaks at  $667\text{-}668\text{ cm}^{-1}$ . The reason could be interpreted as the  $\text{Fe-O-Fe}$  and  $\text{Fe-O}$  bonds connect with  $\text{Si}$  in  $\text{Cys-Fe(III)}@m\text{SiO}_2$ , which forms the  $\text{Si-O-Fe}$  bonds after the addition of silicon to the solution. Overall, FT-IR analysis probably shows that  $\text{Cys-Fe(III)}@m\text{SiO}_2$  is not a simple mixture of raw materials. New chemical compounds containing iron and silicon are formed during the synthesis of the samples.

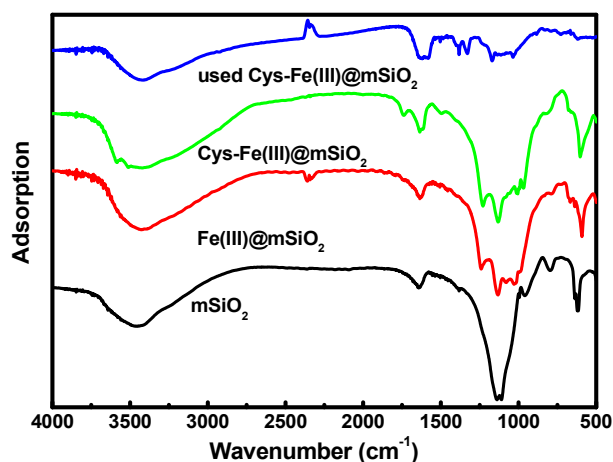

Fig. S1. FT-IR spectra of mSiO<sub>2</sub>, Fe(III)@mSiO<sub>2</sub>, Cys-Fe(III)@mSiO<sub>2</sub> and used Cys-Fe(III)@mSiO<sub>2</sub> after the Fenton-like degradation and silica coagulation processes for nanofiltration concentrates

## 2. Effect of H<sub>2</sub>O<sub>2</sub> concentration for the degradation of nanofiltration concentrates

The H<sub>2</sub>O<sub>2</sub> consumption was related to color and COD removal in the nanofiltration concentrates. Fig. S2 shows the removal of color and COD at different H<sub>2</sub>O<sub>2</sub> concentrations of Cys-Fe(III)@mSiO<sub>2</sub>. When the mole ratio of Fe(III) ions to H<sub>2</sub>O<sub>2</sub> increased from 1:10 to 1:20, the color and COD removal increased from 73.1 % and 52.6 % to 98.4 % and 83.3 %. However, the mole ratio of Fe(III) ions to H<sub>2</sub>O<sub>2</sub> varied from 1:30 to 1:40, the color and COD removal decreased from 90.6 % and 69.8 % to 58.6 % and 27.4 %. The reduced efficiency of the color and COD might lie to the hydroperoxyl radical (HO<sub>2</sub>•) was generated since the excess amount of H<sub>2</sub>O<sub>2</sub> could attack the active hydroxyl radical (•OH). And HO<sub>2</sub>• has little acceleration effect in the degradation processes. As well known in the references, the generation rates of Fe(III) with H<sub>2</sub>O<sub>2</sub> to hydroxyl radicals is much lower than that of Fe(II) with H<sub>2</sub>O<sub>2</sub>. With the use of iron and cysteine in Cys-Fe(III)@mSiO<sub>2</sub>, sulfur compounds could stimulate the

circulation valences of iron ions, thereby improve the Fenton-like catalytic activity of Fe(III) ions. And the similar enhancement of Fe(III) degradation was observed with the adding assistance of Cys in Fe(III)/mSiO<sub>2</sub> for the degradation of nanofiltration concentrates.

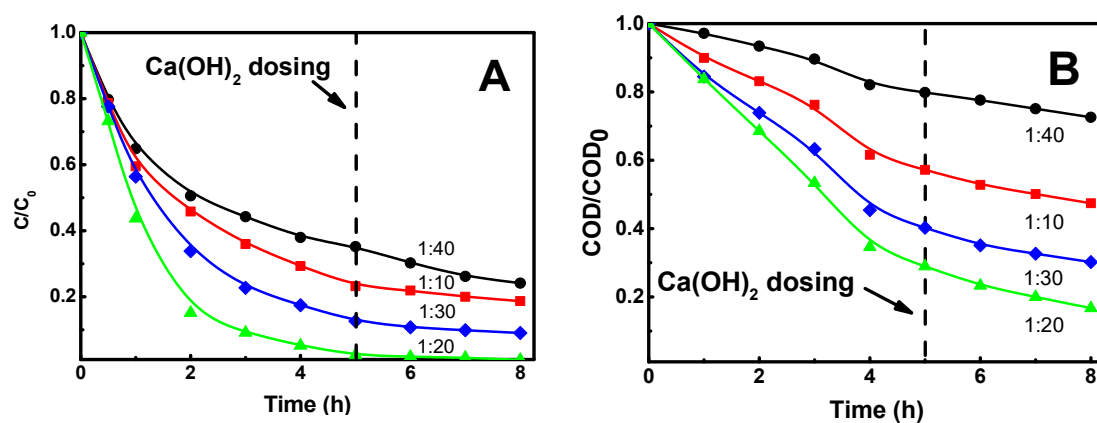

Fig. S2 Effect of H<sub>2</sub>O<sub>2</sub> concentration for Cys-Fe(III)@mSiO<sub>2</sub> on color removal (A) and COD (B) during the degradation of nanofiltration concentrates (200 mg/L Fe(III), pH<sub>0</sub>=4, pH<sub>1</sub>=8.5 at 8 h).
